# Supplementary material for: Disagreements in Medical Ethics Question Answering Between Large Language Models and Physicians
Source: PubMed Central journal article supplement (PMC11601831; doi:10.21203/rs.3.rs-5382879/v1), 2024-11-15
Supplement: NIHPPRS5382879V1-supplement-1.pdf [file NIHPPRS5382879V1-supplement-1.pdf]

## Supplementary Files

This is a list of supplementary files associated with this preprint. Click to download.

- [SupplementaryFile1.xlsx](#)
- [SupplementaryFile2.xlsx](#)
- [SupplementaryOnlinecontant.docx](#)
